# Supplementary material for: Factors That Control the Force Needed to Unfold a Membrane Protein in Silico Depend on the Mode of Denaturation
Source: Int J Mol Sci. 2023 Jan 31;24(3):2654. doi: 10.3390/ijms24032654 (PMC9917119; doi:10.3390/ijms24032654)
Supplement: Supplementary file 1 [file ijms-24-02654-s001.zip]

Archive with 4 entries (4 files):
- ijms-2163330-Supplemental Material.pdf
- vid_S1.mp4
- vid_S2.mp4
- vid_S3.mp4
